# Supplementary material
Source: PubMed Central journal article supplement (PMC8314516)
Supplement: 12931_2021_1797_MOESM2_ESM.pdf [file 12931_2021_1797_MOESM2_ESM.pdf]

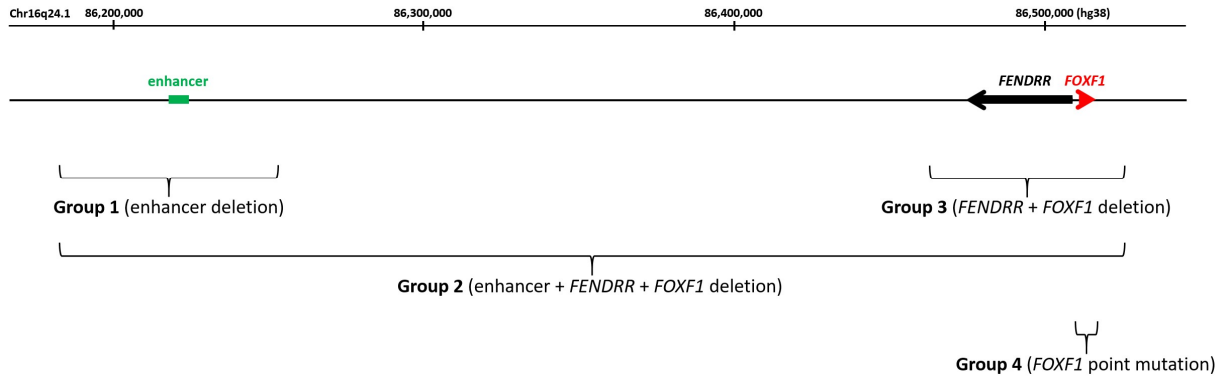

**Additional file 2.** Schematic representation of CNVs and point mutations detected within *FOXF1* locus in ACDMPV patients
