# Supplementary material
Source: PubMed Central journal article supplement (PMC8314516)
Supplement: 12931_2021_1797_MOESM7_ESM.pdf [file 12931_2021_1797_MOESM7_ESM.pdf]

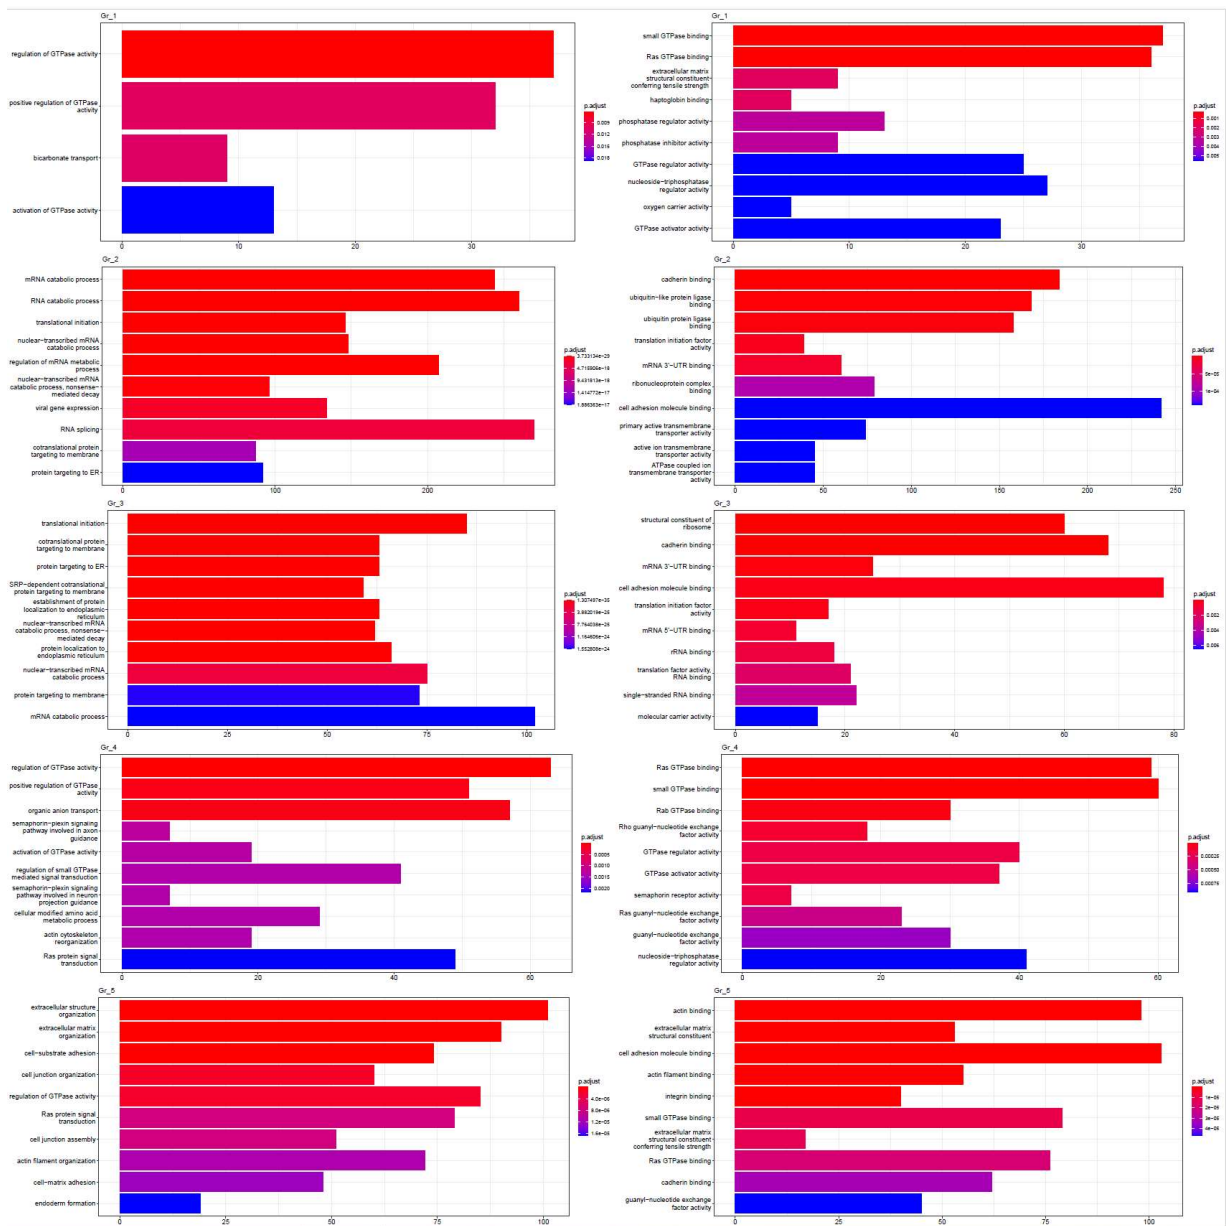

**Additional file 7.** Gene ontology analysis of differentially expressed genes in each group. A bar chart of the most significant gene ontology (GO) biological processes (left panel) and molecular function (right panel) terms for differentially expressed genes.
