# Supplementary material
Source: PubMed Central journal article supplement (PMC8314516)
Supplement: 12931_2021_1797_MOESM10_ESM.pdf [file 12931_2021_1797_MOESM10_ESM.pdf]

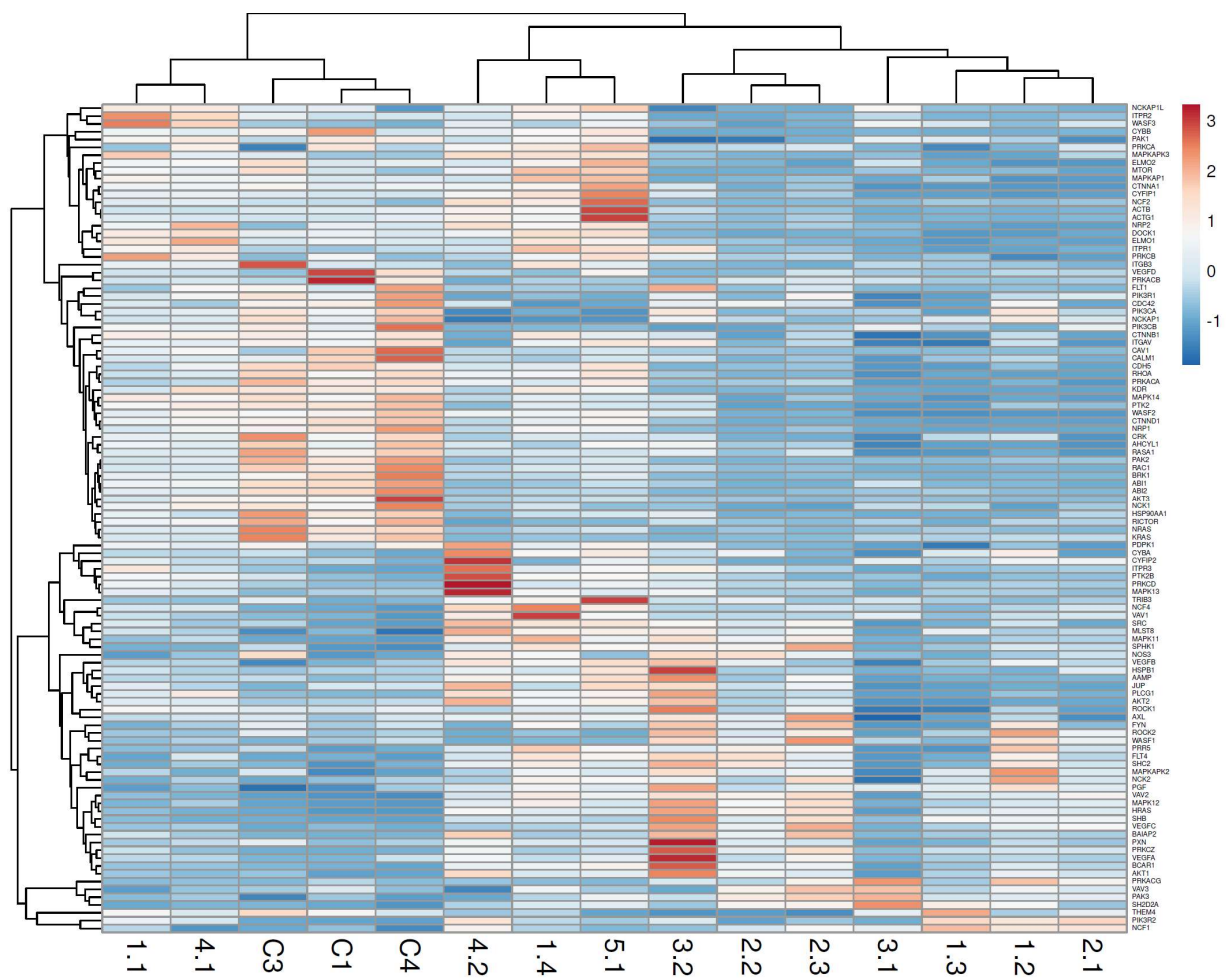

**Additional file 10.** Heatmap indicating hierarchical clustering of ACDMPV and non-ACDMPV control samples based on the RNA-seq expression values of genes from VEGF signaling (R-HSA-194138).
