# Supplementary material
Source: PubMed Central journal article supplement (PMC8314516)
Supplement: 12931_2021_1797_MOESM12_ESM.pdf [file 12931_2021_1797_MOESM12_ESM.pdf]

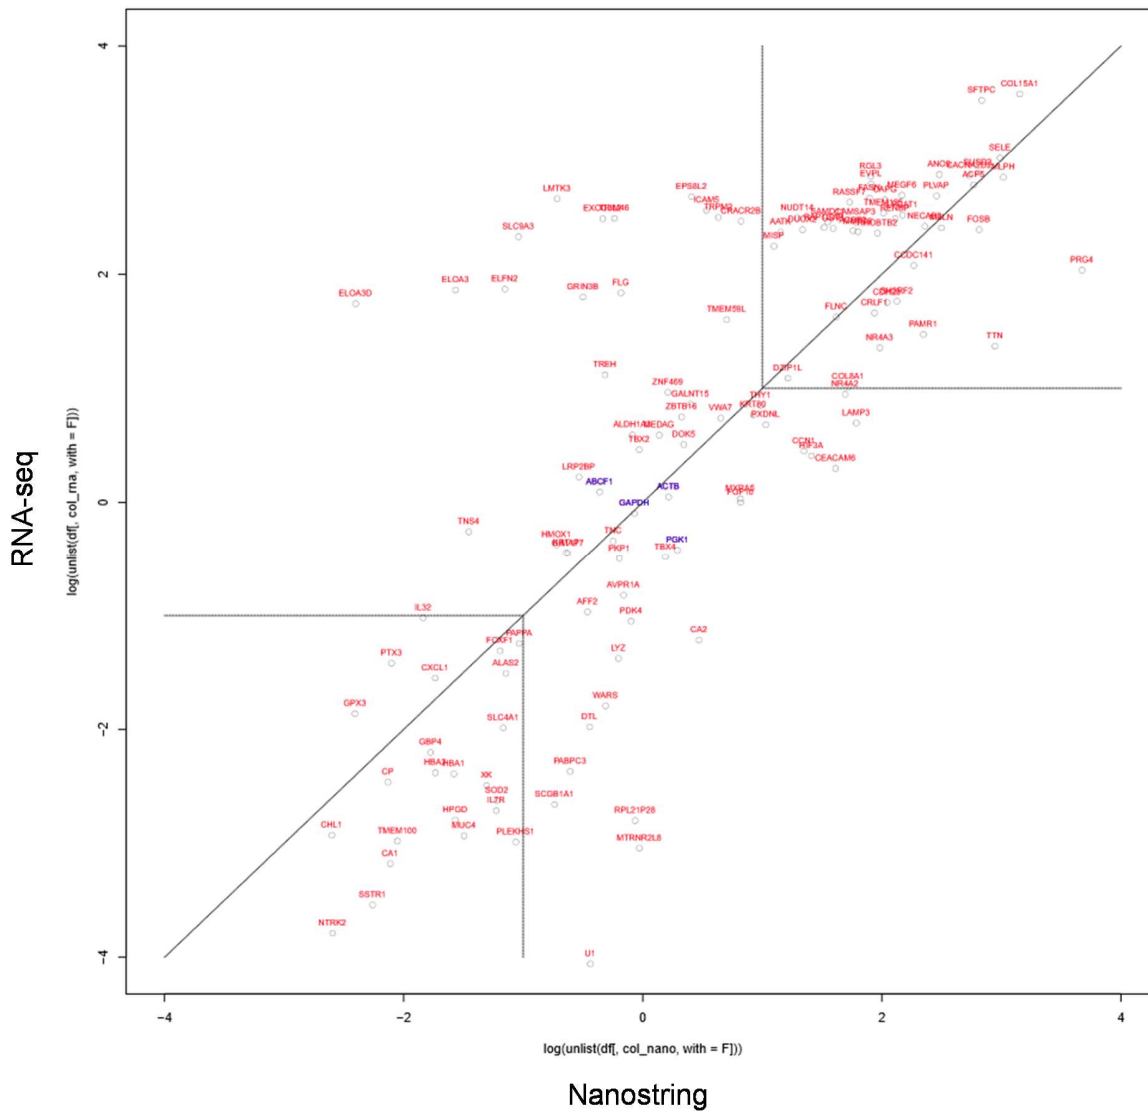

**Additional file 12.** Mutual comparison of RNA-seq and NanoString nCounter-determined changes in ACDMPV transcriptomes. Both methods detected relatively similar changes in expression levels of selected 120 genes.
