# Supplementary material
Source: PubMed Central journal article supplement (PMC8314516)
Supplement: 12931_2021_1797_MOESM14_ESM.pdf [file 12931_2021_1797_MOESM14_ESM.pdf]

# TMEM100

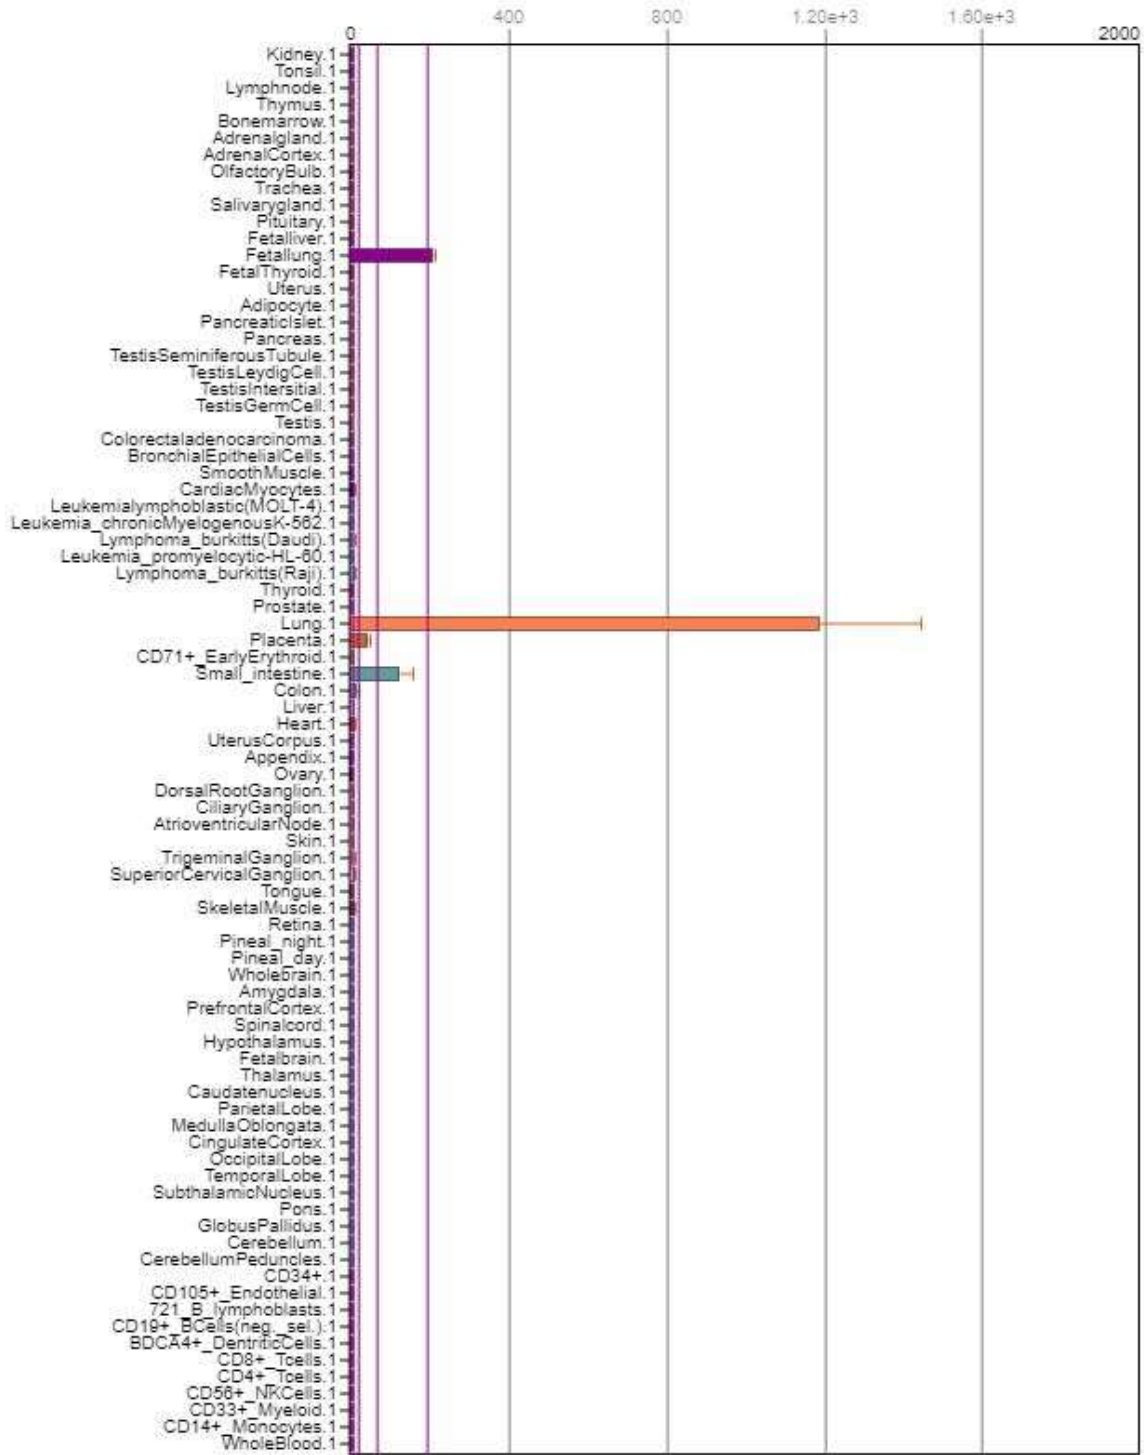

Median(6.4)  
3xN3xM 20xM

# FOXF1

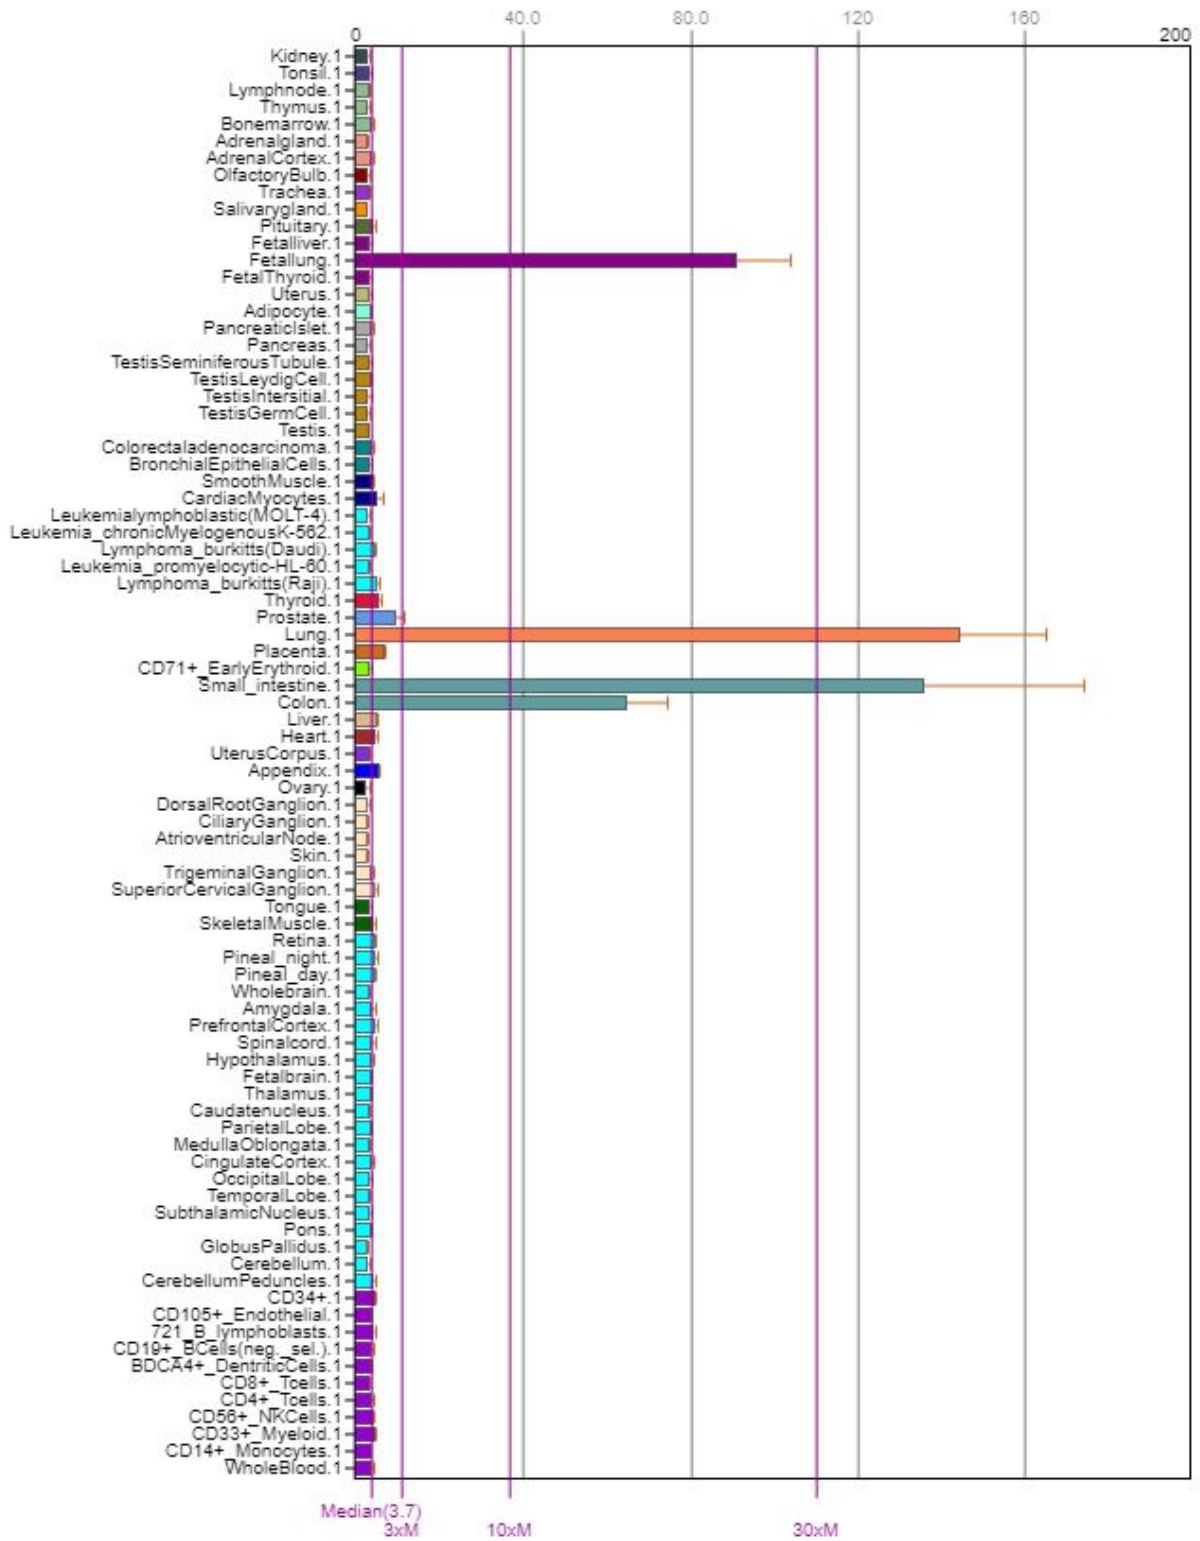

**Additional file 14.** Bio-GPS (<http://biogps.org/#goto=welcome>) graphs demonstrating similar fetal lung- and lung-specific expression pattern of *TMEM100* and *FOXF1*.
